# Supplementary material for: Porphyromonas gingivalis suppresses oral squamous cell carcinoma progression by inhibiting MUC1 expression and remodeling the tumor microenvironment
Source: PubMed Central journal article supplement (PMC11076995; doi:10.1002/1878-0261.13517), 2023-09-13
Supplement: MOL2-18-1174-s001.pdf [file MOL2-18-1174-s001.pdf]

*Porphyromonas gingivalis* suppresses oral squamous cell carcinoma progression by inhibiting MUC1 and remodeling tumor microenvironment

2 Fig. S1

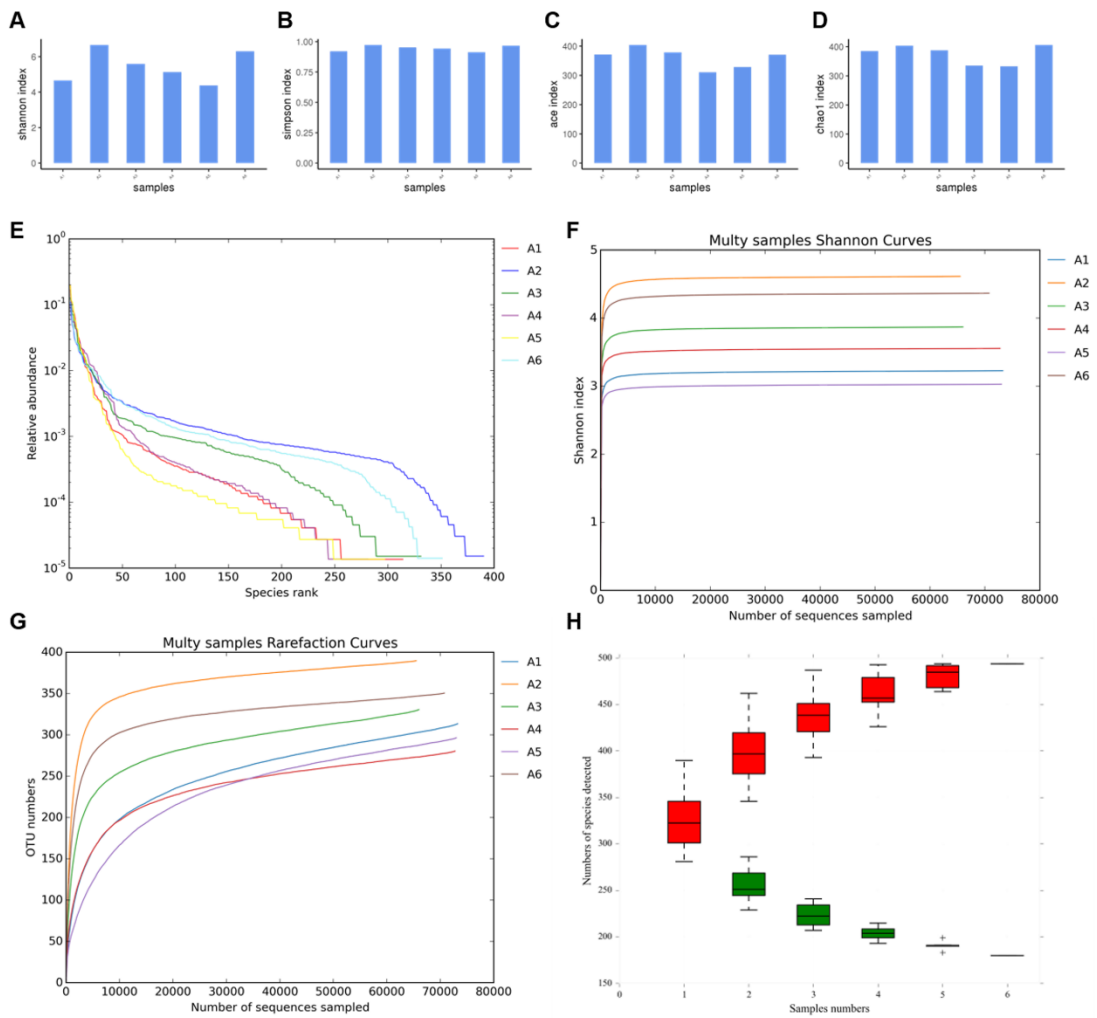

3

4 **Fig. S1.** Alpha diversity of microbiomes in OSCC tissues. A) Shannon and B) Simpson indices were  
5 used to demonstrate species diversity, the C) Ace indices and D) chao1 indices reflected species  
6 richness. E) Rank abundance curve. F) Shannon exponential curve, G) Rarefaction Curve and H)  
7 cumulative relative abundance curve of OSCC samples.

8

9 **Fig. S2**

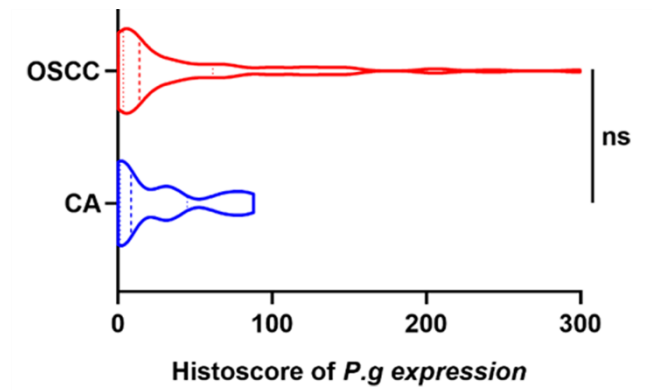

10

11 **Fig. S2** The IHC analysis of *P.gingivalis* expression per  $\mu\text{m}^2$  in OSCC and CA. CA, Adjacent cancer.

12 The data are represented as Mean $\pm$ SD, CA=23, OSCC=56 (Mann-Whitney test was used. ns, not

13 significant, scale bar=100 $\mu\text{m}$ ).

14

15

16

17

18

19

20

21

22

23

24

25

26

27 **Fig. S3**

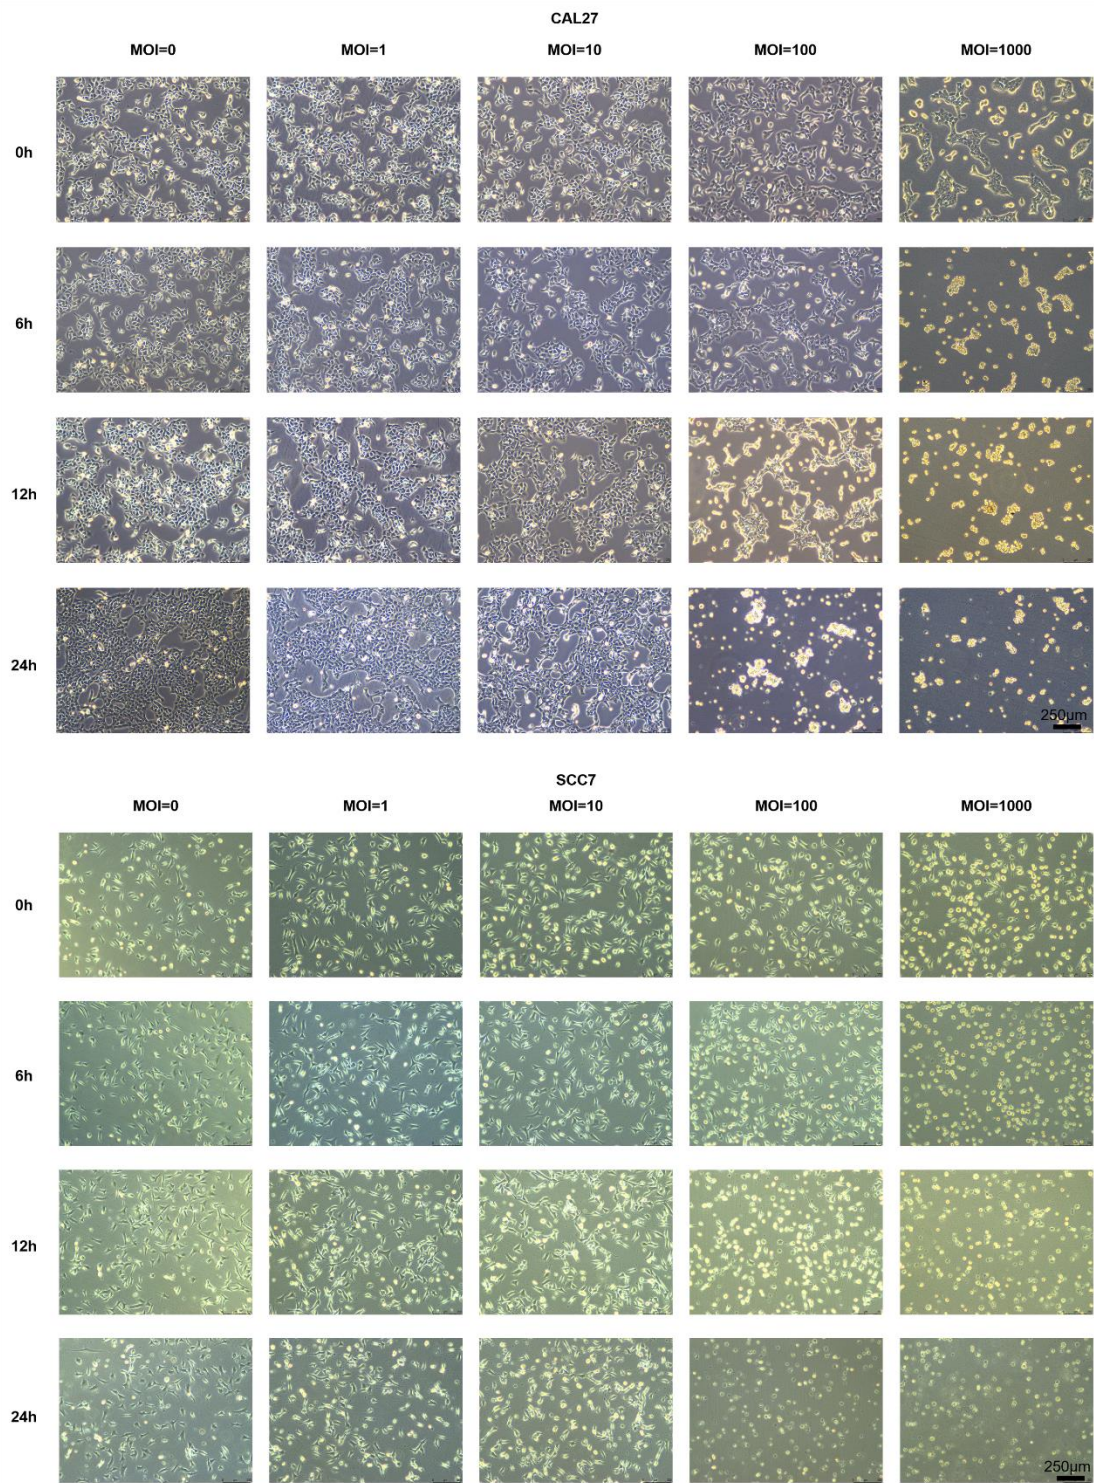

28

29 **Fig. S3.** CAL27 and SCC7 treated with *P. gingivalis* at different concentrations and times under

30 microscope. Scale bar = 250 µm. All experiments were independently repeated in triplicate.

31

32

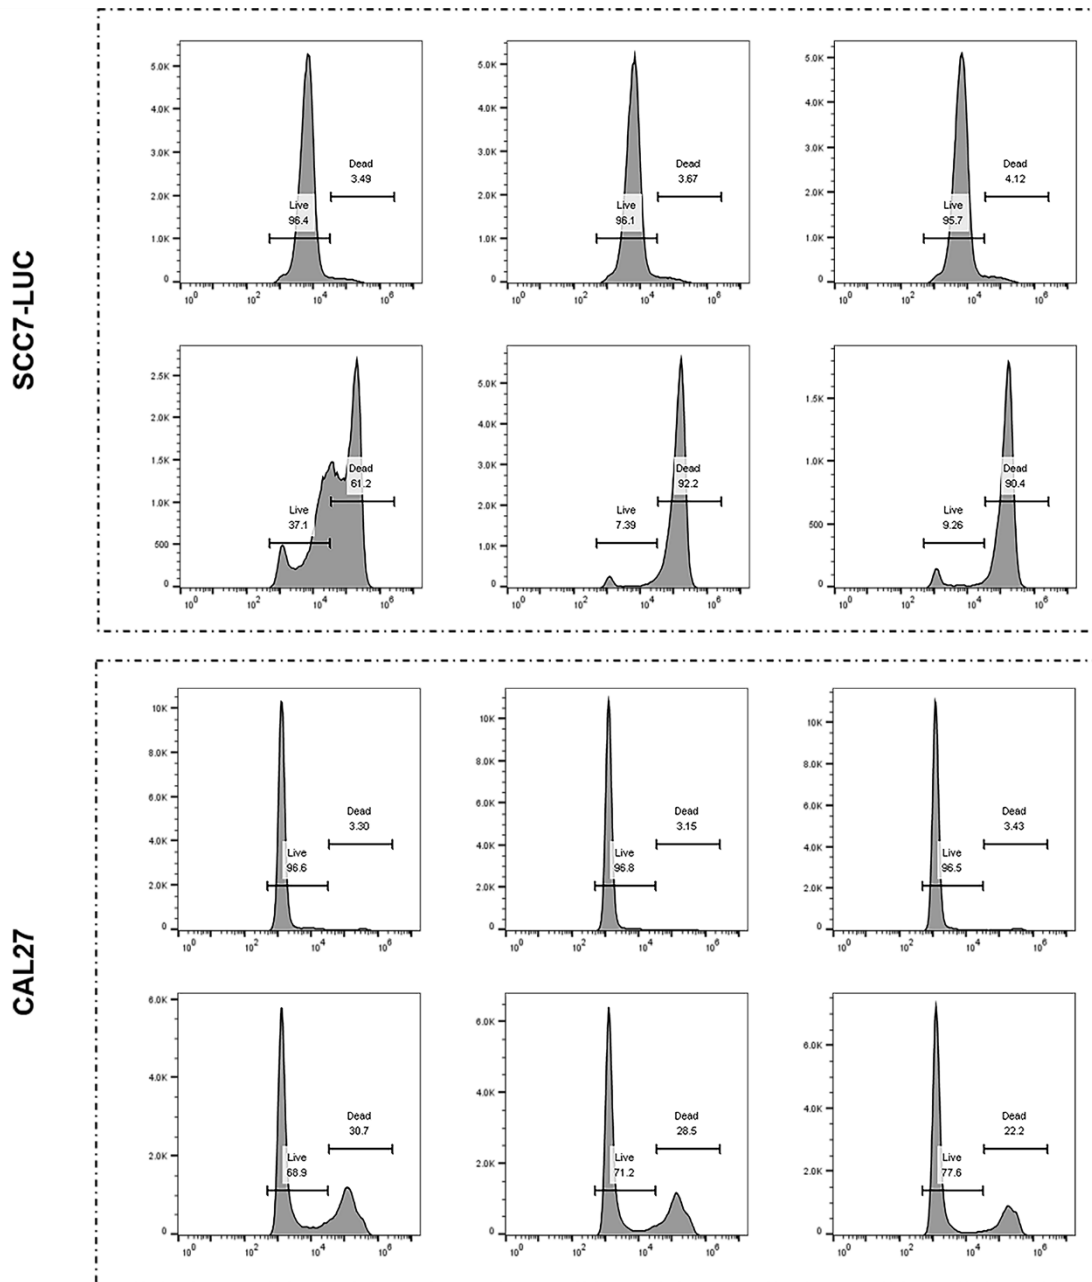

34

35 **Fig. S4.** Flow cytometry analysis of the death ratio of CAL27 and SCC7 disposed with or without

36 *P. gingivalis* (MOI = 1000) for 24 hours. All experiments were independently repeated in triplicate.

37

38

39

40

41 Fig. S5

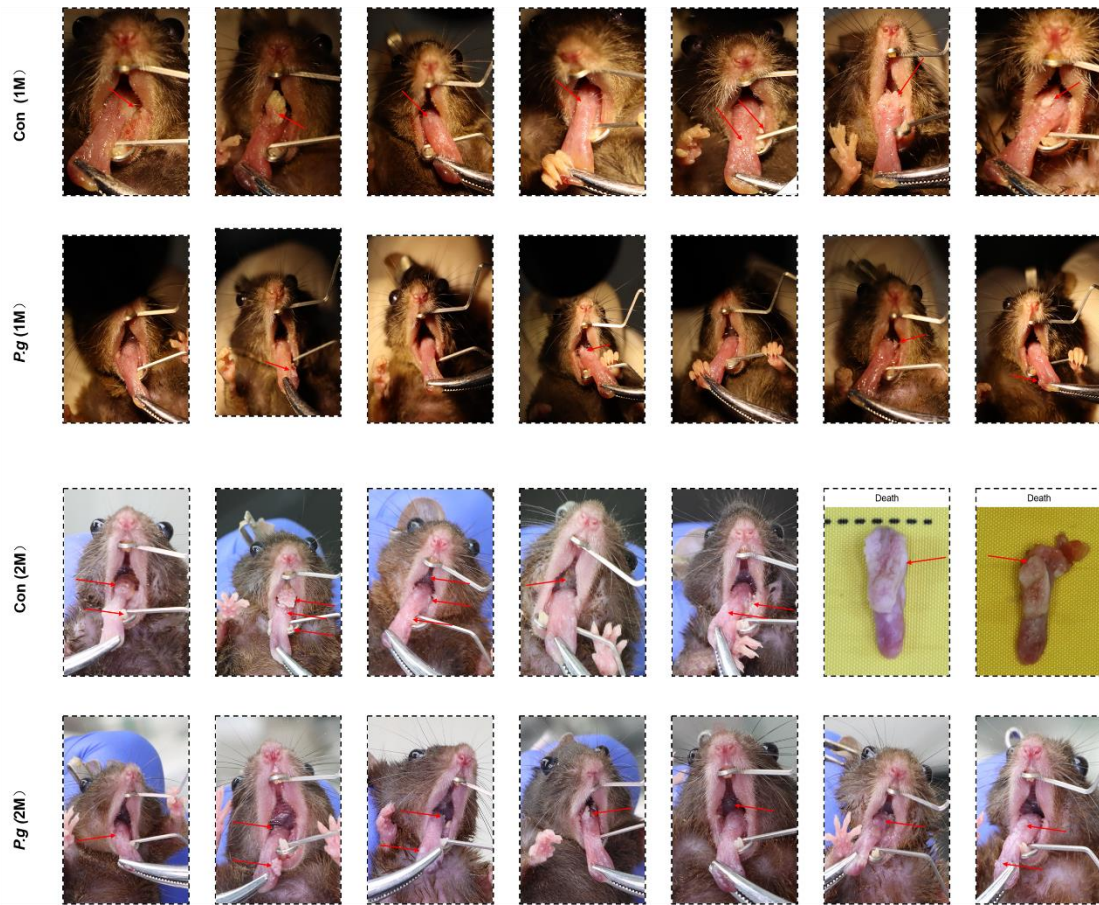

42

43 **Fig. S5.** Real-time monitoring tumors of 4NQO mice disposed with or without *P. gingivalis* for one  
44 month and two months (n=7).

45

46

47

48

49

50

51

52

53

54 **Fig S6**

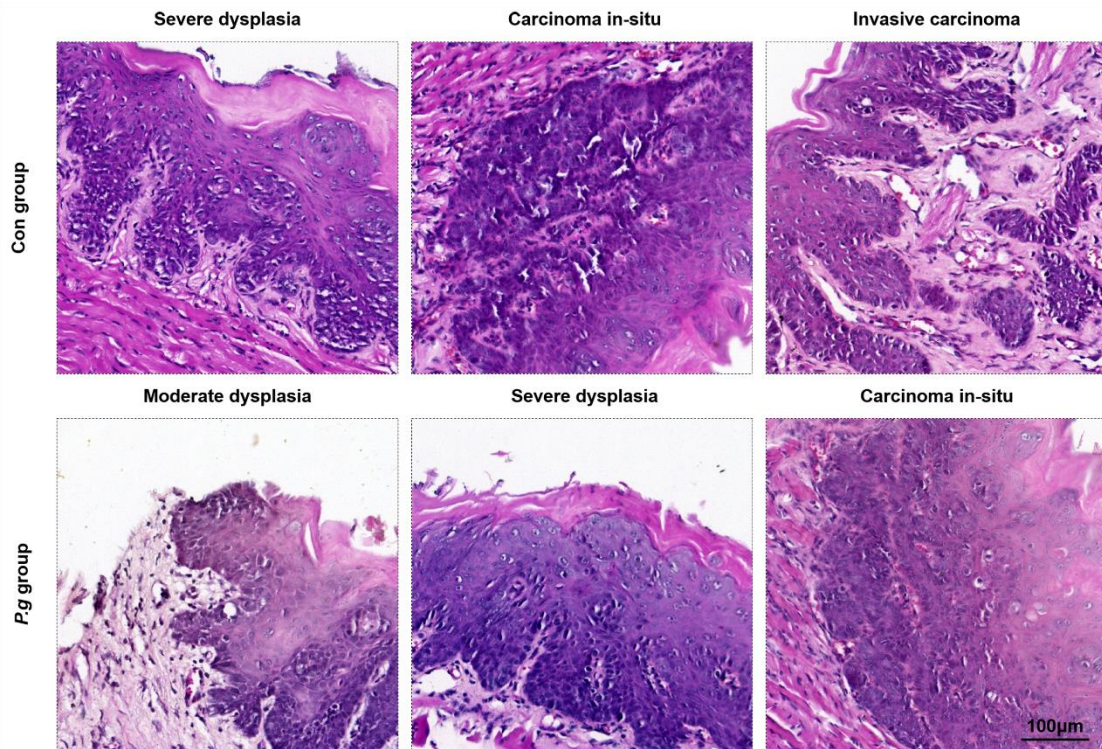

55

56 **Fig. S6** Representative pictures of HE staining, containing mild to severe dysplasia, carcinoma in  
57 situ and invasive carcinoma. (n=5, Scale Bar=100µm).

58

59

60

61

62

63

64

65

66

67

68

69 Fig. S7

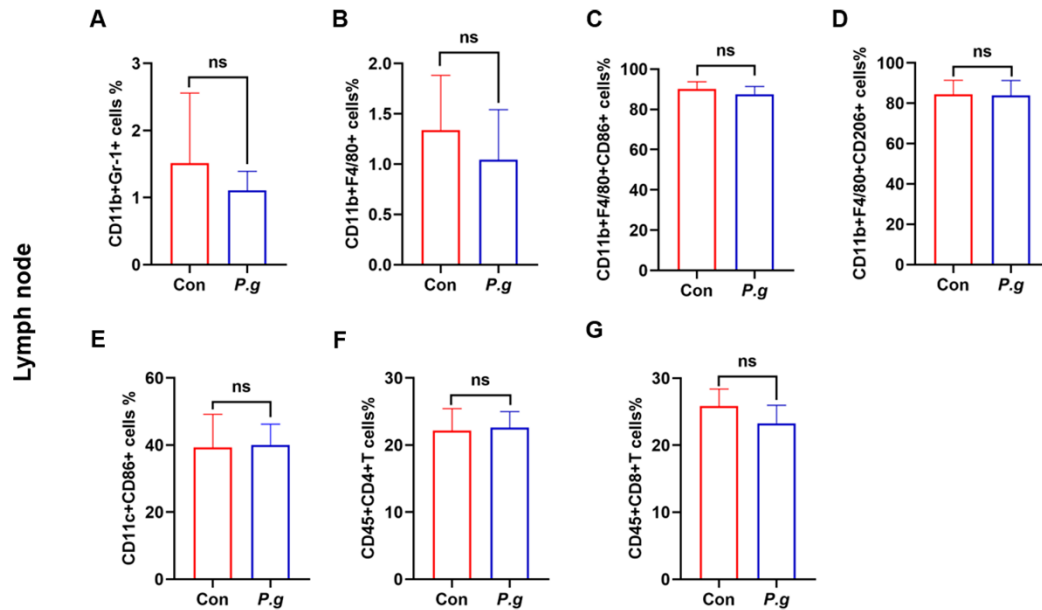

70

71 **Fig. S7.** Various infiltrating immune cell subsets in the lymph nodes of 4NQO-induced mice. The  
72 percentage of tumor-infiltrating **A.** CD11b<sup>+</sup> Gr-1<sup>+</sup> MDSCs, **B.** CD11b<sup>+</sup> F4/80<sup>+</sup> Macrophages, **C.**  
73 CD11b<sup>+</sup> F4/80<sup>+</sup> CD86<sup>+</sup> M1-like Macrophages, **D.** CD11b<sup>+</sup> F4/80<sup>+</sup> CD206<sup>+</sup> M2-like Macrophages,  
74 **E.** CD11c<sup>+</sup> CD86<sup>+</sup> Matured DCs, **F.** CD4<sup>+</sup> T cells and **G.** CD8<sup>+</sup> T cells were compared. All data are  
75 represented as Mean±SD, n=3. (Unpaired t test Welch's correction was used for MDSC,  
76 unpaired t test was used for the rest, ns, not significant).

77

78

79

80

81

82

83

84

85

86

87

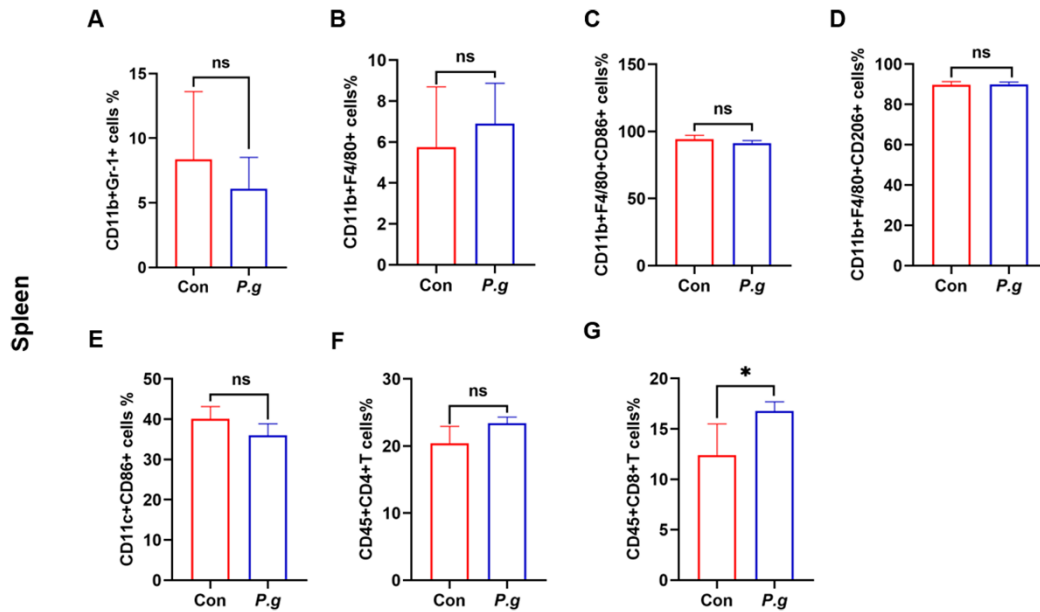

89

90 **Fig. S8.** Various infiltrating immune cell subsets in the spleen of 4NQO-induced mice. The  
 91 percentage of tumor-infiltrating **A.** CD11b<sup>+</sup> Gr-1<sup>+</sup> MDSCs, **B.** CD11b<sup>+</sup> F4/80<sup>+</sup> Macrophages, **C.**  
 92 CD11b<sup>+</sup> F4/80<sup>+</sup> CD86<sup>+</sup> M1-like Macrophages, **D.** CD11b<sup>+</sup> F4/80<sup>+</sup> CD206<sup>+</sup> M2-like Macrophages,  
 93 **E.** CD11c<sup>+</sup> CD86<sup>+</sup> Matured DCs, **F.** CD4<sup>+</sup> T cells and **G.** CD8<sup>+</sup> T cells were compared. All data are  
 94 represented as Mean±SD, n=3. (Unpaired t test with Welch's correction was used for CD8<sup>+</sup>T  
 95 cells, unpaired t test was used for the rest, \*,  $P < 0.05$ ; ns, not significant).
